# Supplementary material for: Mäns våld mot kvinnor, mänskliga rättigheter och jämställdhet : Bakgrund och kritiska perspektiv
Source: Hindawi journal article supplement (doi:10.1155/2014/291862), 2012-01-01
Supplement: f1 [file 291862.f1.pdf]

**Table 1: Overview of all published Genome-wide Association Studies in Alzheimer's disease**

| Study                              | Ethnic           | SNPS      | Sample size                                                                         | Genes identified                                                                            |
|------------------------------------|------------------|-----------|-------------------------------------------------------------------------------------|---------------------------------------------------------------------------------------------|
| Grupe, 2007 <sup>[85]</sup>        | USA, UK          | 17,343    | Stage 1: 380 AD cases; 396 controls<br>Stage 2: 1,428 AD cases; 1,666 controls      | TOMM40, APOE, GALP, TNK1, APOC2, PCK1, LMNA, PGBD1, LOC651924, THEM5, MYH13, BCR, CTSS, UBD |
| Coon, 2007 <sup>[86]</sup>         | USA, Netherlands | 502,627   | 664 AD cases; 422 controls                                                          | APOE                                                                                        |
| Reiman, 2007 <sup>[87]</sup>       | USA, Netherlands | 502,627   | Stage 1: 446 AD cases; 290 controls<br>Stage 2: 415 AD cases; 260 controls          | GAB2                                                                                        |
| Li, 2008 <sup>[88]</sup>           | Canada           | 469,438   | Stage 1: 753 AD cases; 736 controls<br>Stage 2: 418 AD cases; 249 controls          | APOE, GOLM1, GWA_15q21.2, GWA_9p24.3                                                        |
| Abraham, 2008 <sup>[89]</sup>      | USA, Europe      | 561,494   | Stage 1: 1,082 AD cases; 1,239 controls<br>Stage 2: 1,400 controls                  | APOE, LRAT                                                                                  |
| Bertram, 2008 <sup>[90]</sup>      | USA              | 484,522   | Stage 1: 941 AD cases; 404 controls<br>Stage 2: 1,767 AD cases; 838 controls        | APOE, ATXN1, CD33, GWA_14q31.2                                                              |
| Poduslo, 2009 <sup>[91]</sup>      | USA              | 489,218   | Stage 1: 9 AD cases; 10 controls<br>Stage 2: 199 AD cases; 225 controls             | TRPC4AP                                                                                     |
| Beecham, 2009 <sup>[92]</sup>      | USA              | 555,000   | Stage 1: 492 AD cases; 496 controls<br>Stage 2: 238 AD cases; 220 controls          | APOE, FAM113B                                                                               |
| Carrasquillo, 2009 <sup>[93]</sup> | USA              | 313,504   | Stage 1: 844 AD cases; 1,255 controls<br>Stage 2: 1,547 AD cases; 1,209 controls    | APOE, PCDH11X                                                                               |
| Potkin, 2009 <sup>[94]</sup>       | USA              | 516,645   | 172 AD cases; 209 controls                                                          | APOE, ARSB, CAND1, EFNA5, MAGI2, PRUNE2, TOMM40                                             |
| Harold, 2009 <sup>[96]</sup>       | USA, Europe      | 529,205   | Stage 1: 3,941 AD cases; 7,848 controls<br>Stage 2: 2,023 AD cases; 2,340 controls  | APOE, CLU, PICALM                                                                           |
| Lambert, 2009 <sup>[95]</sup>      | Europe           | 537,029   | Stage 1: 2,032 AD cases; 5,328 controls<br>Stage 2: 3,978 AD cases; 3,297 controls  | APOE, CLU, CR1                                                                              |
| Seshadri, 2010 <sup>[99]</sup>     | USA, Europe      | 2,540,000 | Stage 1: 3,006 AD cases; 14,642 controls<br>Stage 2: 2,032 AD cases; 5,328 controls | APOE, BIN1, CLU, EXOC3L2, PICALM                                                            |
| Bettens, 2010 <sup>[98]</sup>      | Belgium          | 4         | 1,078 AD cases and 652 controls                                                     | ATXN1                                                                                       |
| Laumet, 2010 <sup>[97]</sup>       | French           | 526       | 2,032 AD cases, 5,328 controls                                                      | TFAM, SORL1, CHRN2, SORCS1, DAPK1, MTHFR, GWA14q32.13, BDNF, NEDD9, and CH25H               |

|                                     |                                                  |                     |                                                                                                                                 |                                                                                                                                                                    |
|-------------------------------------|--------------------------------------------------|---------------------|---------------------------------------------------------------------------------------------------------------------------------|--------------------------------------------------------------------------------------------------------------------------------------------------------------------|
| Naj, 2010 <sup>[100]</sup>          | USA                                              | 483,399             | Stage 1: 931 AD cases; 1,104 controls<br>Stage 2: 1,338 AD cases; 2,003 controls                                                | APOE, MTHFD1L                                                                                                                                                      |
| Lee, 2011 <sup>[101]</sup>          | Caribbean Hispanic                               | 627,380             | 549 AD cases; 544 controls                                                                                                      | CLU, PICALM, BIN1, CUGBP2, loci on 2p25.1; 3q25.2; 7p21.1; 10q23.1                                                                                                 |
| Sherva, 2011 <sup>[102]</sup>       | Israel                                           | 2,540,000           | 124 AD cases; 142 controls                                                                                                      | AGPAT1, ATP6V0A4, GLOD4, RGS6, TMEM132C                                                                                                                            |
| Wijsman, 2011 <sup>[103]</sup>      |                                                  | 565,336             | Stage 1: 1,848 AD cases; 1,991 controls<br>Stage 2: 617 AD cases; 573 controls                                                  | APOE, BIN1, CLU, CR1                                                                                                                                               |
| Hollingworth, 2011 <sup>[106]</sup> | USA, Europe                                      | 496,763             | Stage 1: 6,688 AD cases; 13,685 controls<br>Stage 2: 4,896 AD cases; 4,903 controls<br>Stage 3: 8,286 AD cases; 21,258 controls | ABCA7, BIN1, CD2AP, CD33, CR1, EPHA1, MS4A4E, MS4A6A                                                                                                               |
| Naj, 2011 <sup>[105]</sup>          | USA                                              | 2,324,889           | Stage 1: 8,309 AD cases; 7,366 controls<br>Stage 2: 3,531 AD cases; 3,565 controls                                              | APOE, BIN1, CD2AP, CD33, CLU, CR1, EPHA1, MS4A4A                                                                                                                   |
| Hu, 2011 <sup>[104]</sup>           | USA                                              | 509,376             | step 1: 1831 AD cases and 1764 controls<br>step 2: 751 AD cases and 751 controls                                                | CR1, CLU                                                                                                                                                           |
| Logue, 2011 <sup>[107]</sup>        | African Americans                                | >600,000            | 513 AD cases and 496 controls                                                                                                   | PVRL2, CLU, PICALM, BIN1, EPHA1, MS4A, ABCA7, and CD33                                                                                                             |
| Kamboh, 2012 <sup>[108]</sup>       | USA                                              | 1,016,423           | Stage 1: 1,440 AD cases and 1,000 controls<br>Stage 2: 2,727 cases and 3,336 controls                                           | APOE, PICALM, BIN1, ABCA7, EPHA1, MS4A/MS4A6E, PPP1R3B                                                                                                             |
| Shi, 2012 <sup>[109]</sup>          | USA, UK                                          | 600,489             | 1047 AD cases; 338 controls                                                                                                     | APOE                                                                                                                                                               |
| Reitz, 2013 <sup>[110]</sup>        | African American                                 |                     | 1,968 AD cases; 3,928 controls                                                                                                  | ABCA7, intergenic locus on 5q35.2                                                                                                                                  |
| Jonsson, 2013 <sup>[112]</sup>      | Icelander,<br>Germany,<br>Netherlands,<br>Norway | 191,777             | Stage 1: 1,092 AD cases; 110,050 controls<br>Stage 2: 2,037 AD cases; 9,727 controls                                            | TREM2                                                                                                                                                              |
| Guerreiro, 2013 <sup>[111]</sup>    | European<br>North<br>American                    |                     | Stage 1: 3,550 AD cases; 1,107 controls<br>Stage 2: 1,887 AD cases; 4,061 controls                                              | TREM2                                                                                                                                                              |
| Lambert JC, 2013 <sup>[113]</sup>   | Europe                                           | 7,055,881<br>11,632 | Stage 1: 17,008 AD cases; 37,154 controls<br>Stage 2: 8,572 AD cases; 11,312 controls                                           | APOE, ABCA7, BIN1, CD33, CLU, CR1, CD2AP, EPHA1, MS4A6A-MS4A4E, PICALM, HLA-DRB5-HLA-DRB1, PTK2B, SORL1, SLC24A4-RIN3, ZCWPW1, CELF1, FERMT2, CASS4, INPP5D, MEF2C |
